# Supplementary material for: Synthesis and optoelectronic properties of a carbazole-modified platinum(ii) complex in polymer light-emitting devices
Source: Royal Society of Chemistry journal article supplement (doi:10.1039/c1dt11346a), 2011-11-24

## Electronic Supplementary Information

Figure S1. TGA thermograms of (ppy)Pt(acac) and (C<sub>16</sub>OC<sub>Z</sub>-ppy)Pt(acac) recorded at a heating rate of 20 °C/min

Figure S2. PL spectra of (ppy)Pt(acac) in DCM solutions at different concentrations from 1×10<sup>-5</sup> M to 1×10<sup>-3</sup> M at RT (λ<sub>ex</sub> = 400 nm)

Figure S3. PL spectra of (C<sub>16</sub>OC<sub>Z</sub>-ppy)Pt(acac) in DCM solutions at different concentrations from 1×10<sup>-5</sup> M to 1×10<sup>-3</sup> M at RT (λ<sub>ex</sub> = 400 nm)

Figure S4. Current density-voltage-luminance (*J-V-L*) curves of the (ppy)Pt(acac)-doped device at different doping concentrations

**Figure S1**

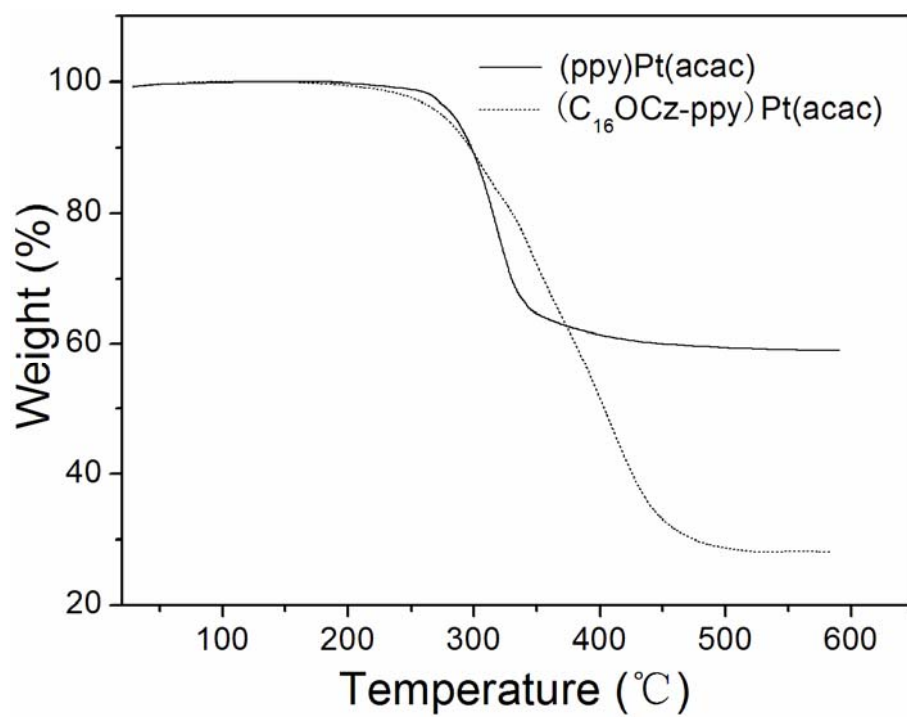

**Figure S2**

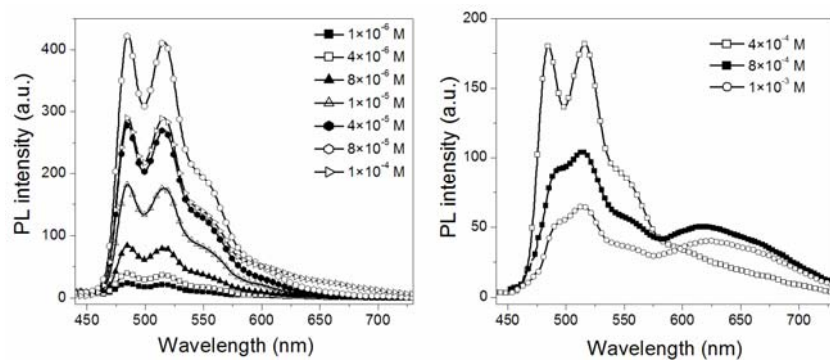

**Figure S3**

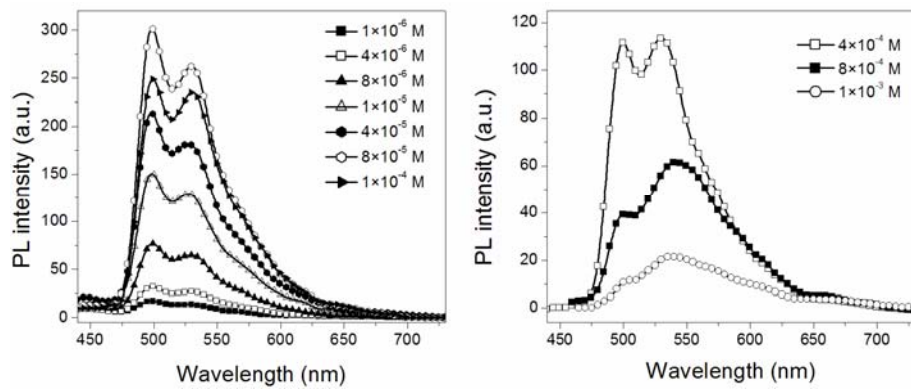

Figure S4

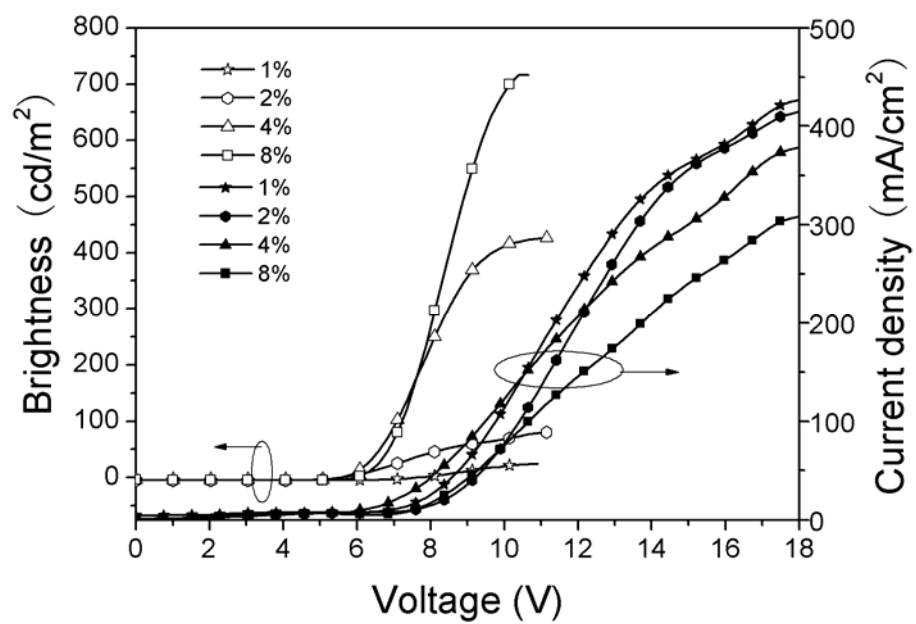

Supplement: c1dt11346a.pdf [file c1dt11346a.pdf]
